# Supplementary material for: Melanoma Progression Inhibits Pluripotency and Differentiation of Melanoma-Derived iPSCs Produces Cells with Neural-like Mixed Dysplastic Phenotype
Source: PubMed Central journal article supplement — Stem Cell Reports. 2019 Jun 20;13(1):177–92. doi: 10.1016/j.stemcr.2019.05.018 (PMC6627006; doi:10.1016/j.stemcr.2019.05.018), 2019-06-20
Supplement: mmc1.pdf [file mmc1.pdf]

**Stem Cell Reports, Volume 13**

**Supplemental Information**

**Melanoma Progression Inhibits Pluripotency and Differentiation of Melanoma-Derived iPSCs Produces Cells with Neural-like Mixed Dysplastic Phenotype**

**Edgardo Castro-Pérez, Carlos I. Rodríguez, Daren Mikheil, Shakir Siddique, Alexandra McCarthy, Michael A. Newton, and Vijayaradhi Setaluri**

## SUPPLEMENTAL INFORMATION

### **Melanoma Progression Inhibits Pluripotency and Differentiation of Melanoma-Derived iPSC Produces Cells with Neural-like Mixed Dysplastic Phenotype**

Edgardo Castro-Pérez<sup>1</sup>, Carlos I. Rodríguez<sup>1,#</sup>, Dareen Mikheil<sup>1</sup>, Shakir Siddique<sup>1</sup>, Alexandra McCarthy<sup>1</sup>, Michael A. Newton<sup>3</sup> and Vijayasradhi Setaluri<sup>1,2,\*</sup>

Running Title: *Melanoma plasticity and drug resistance*

<sup>1</sup>Department of Dermatology, University of Wisconsin School of Medicine and Public Health, Madison, WI 53706, USA

<sup>2</sup>William S. Middleton Memorial Veterans Hospital, Madison, WI 53705, USA

<sup>3</sup>Department of Statistics, Department of Biostatistics and Medical Informatics, University of Wisconsin-Madison, Madison WI, 53706 USA

\*Corresponding author:

Vijayasradhi Setaluri, PhD  
Department of Dermatology  
1300 University Avenue, B25  
University of Wisconsin-Madison  
Madison, WI 53706

Tel: (608) 263-5362

E-mail: setaluri@wisc.edu

**Keywords:** melanocytes, malignant transformation, BRAF oncogene, melanoma tumor progression, melanoma iPSC reprogramming, melanoma plasticity, melanocyte differentiation, neural-like dysplasia, MAPKi resistance

# Current address:

Department of Pathology, University of California-San Francisco, 513 Parnassus Ave, San Francisco CA, 94143 USA.

SUPPLEMENTAL FIGURES

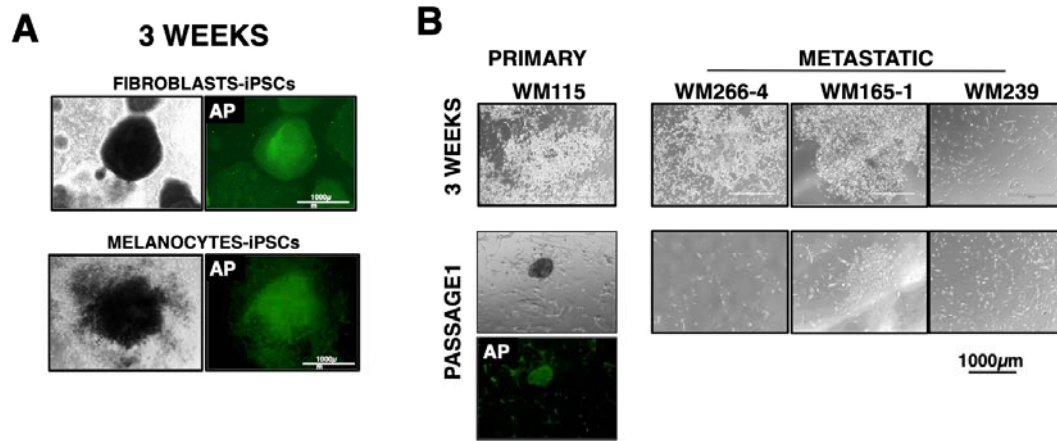

FIGURE S1

Figure S1 (Related to Figure 1)

**Reprogramming of Fibroblasts and Melanocytes, and Matched Primary and Metastatic Melanoma Cells from the Same Patient.**

(A) Morphology of fibroblast- and melanocyte-derived iPSC and AP staining after three weeks of reprogramming.

(B) Morphology of primary (WM115) and metastatic cells (WM266-4, WM165-1, WM239) from the same patient at 3 weeks (*top panels*) and passage 1 (*bottom panels*) of reprogramming. AP staining of WM115-miPSC colony.

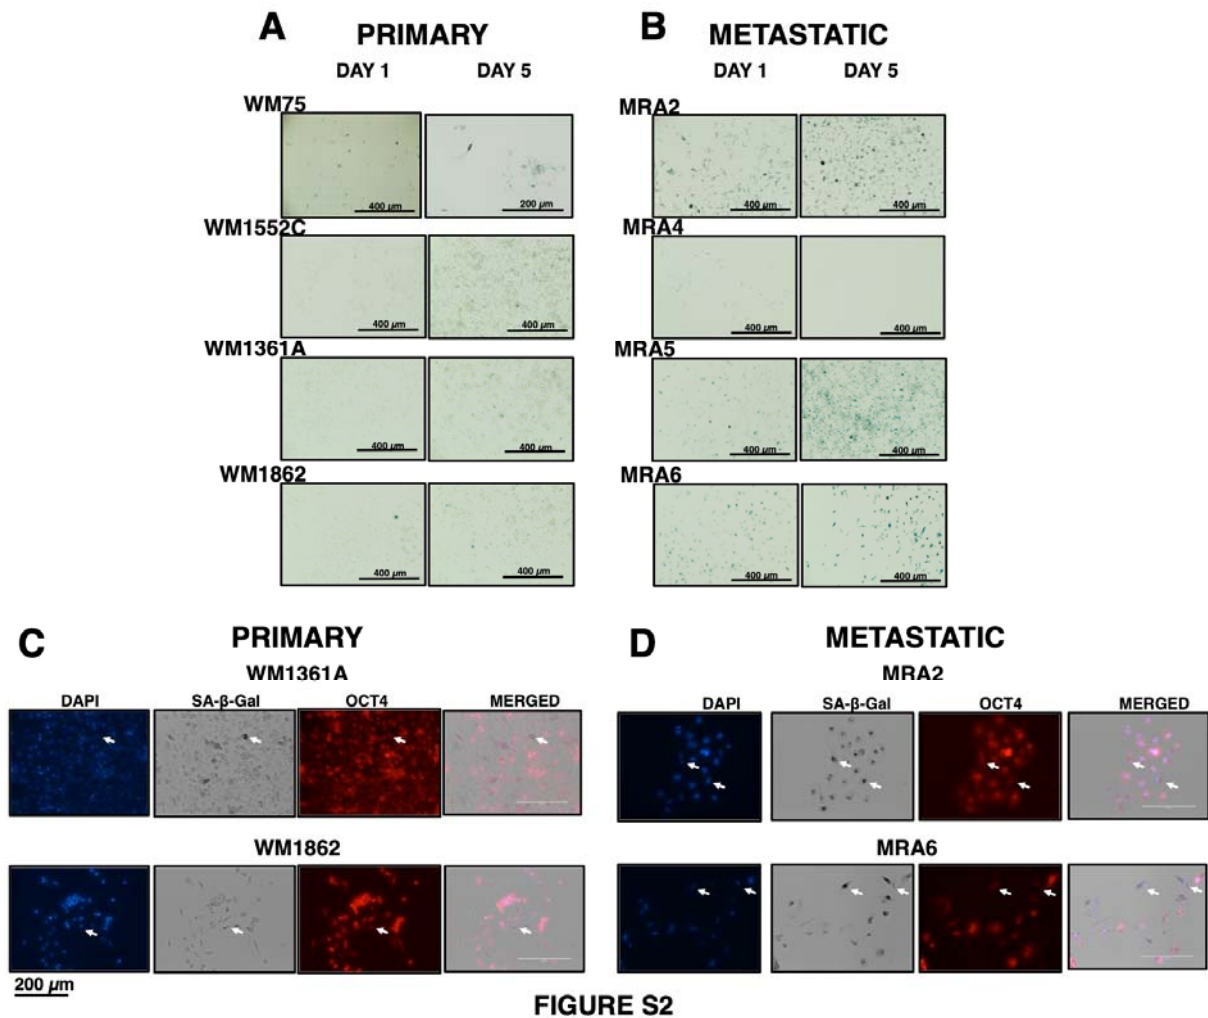

Figure S2 (Related to Figure 2)

**Effect of Transduction with Reprogramming Factors on Senescence (SA-β-Gal Staining) and Co-staining with OCT4.**

(A-B) SA-β-Gal staining of primary and metastatic cells at days 1 and 5 after transduction.

(C-D) SA-β-Gal co-staining with OCT4 determined by immunofluorescence at day 5 after transduction.

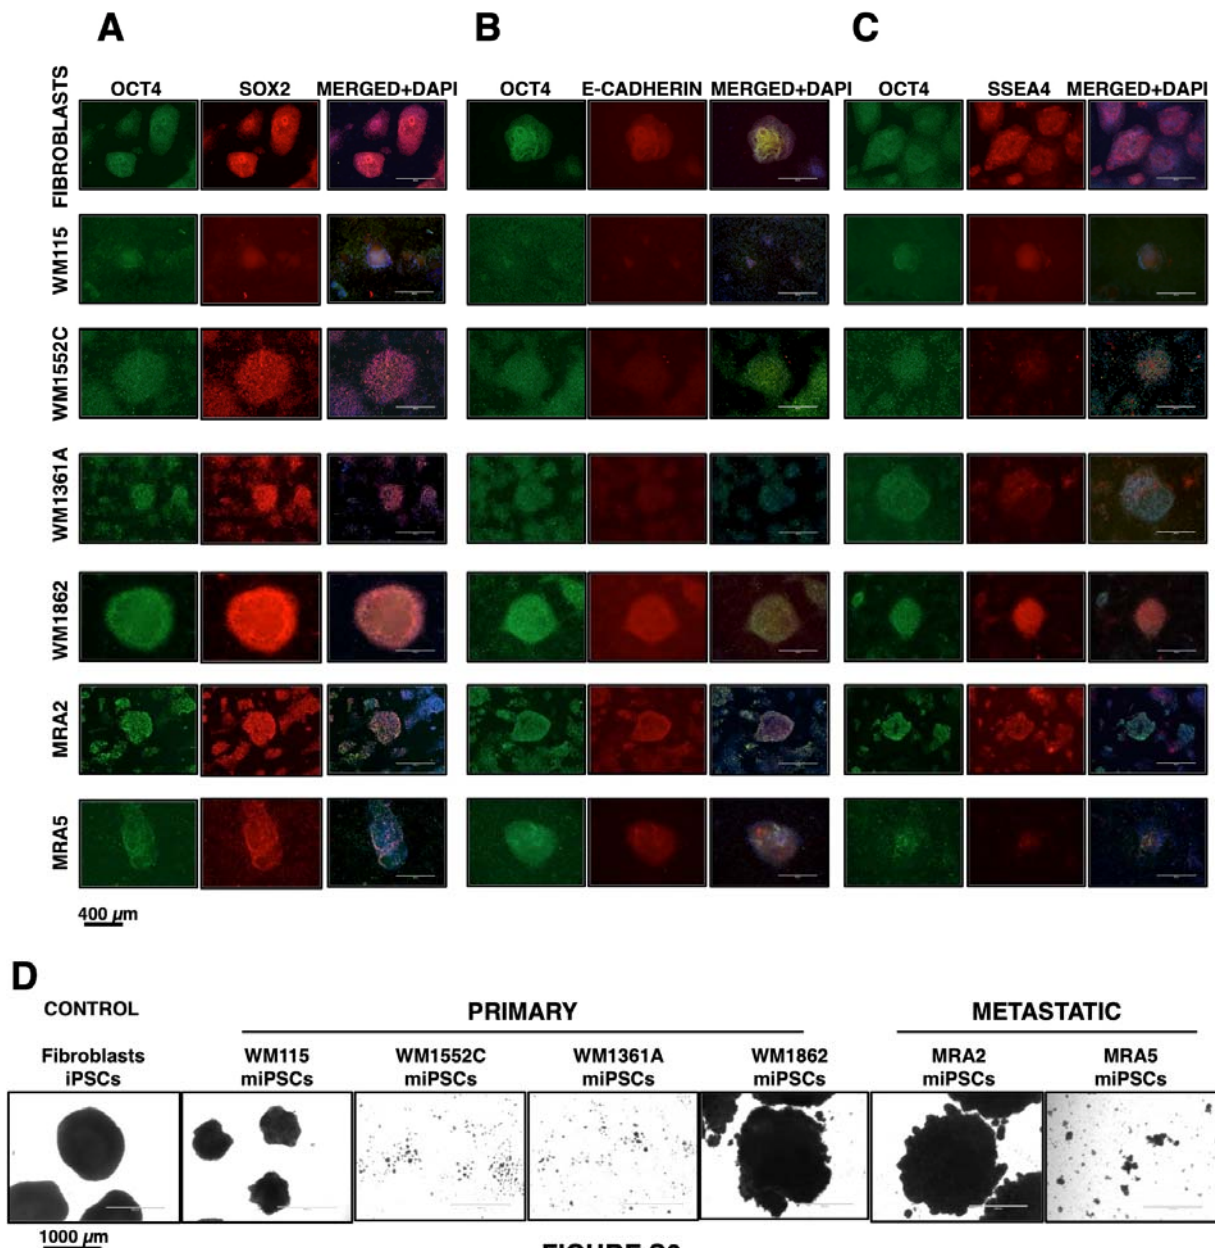

**FIGURE S3**

**Figure S3 (Related to Figure 4)**

**Expression of Stem Cell Markers and EB formation.**

Immunofluorescence staining of (A) reprogramming factors OCT4 and SOX2; (B) OCT4 and E-Cadherin; (C) OCT4 and SSEA4. (D) Embryoid body formation of fibroblasts iPSCs, and primary and metastatic melanoma miPSCs.

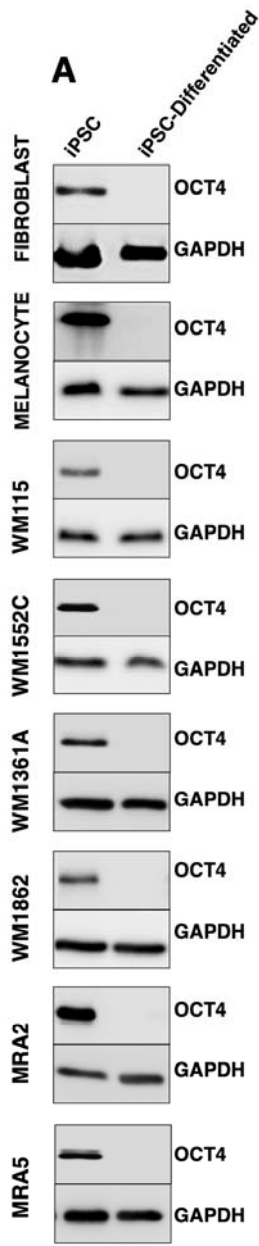

FIGURE S4

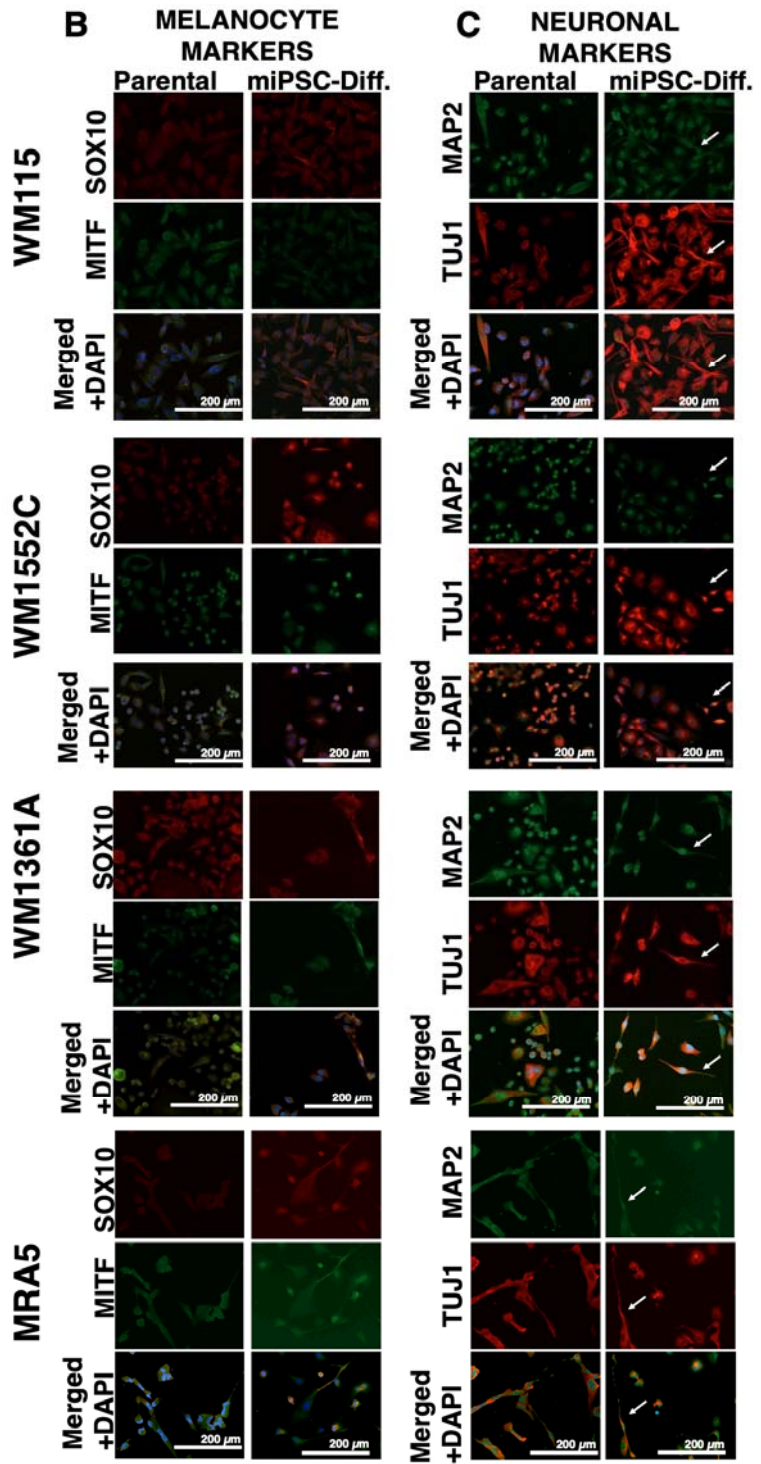

**Figure S4 (Related to Figure 5)**

**Expression of OCT4, Melanocyte and Neural Markers in miPSC-differentiated cells**

(A) Western blot analysis of melanoma-iPSCs (miPSC) and miPSC-Differentiated cells with OCT4 and GAPDH. Data show that miPSC-differentiated cells no longer expressed the reprogramming factors.

(B) Immunofluorescence staining of melanocyte markers in parental and miPSC-differentiated cells in melanocyte differentiation medium.

(C) Neuronal markers expression in parental and miPSC-differentiated cells in melanocyte differentiation medium.



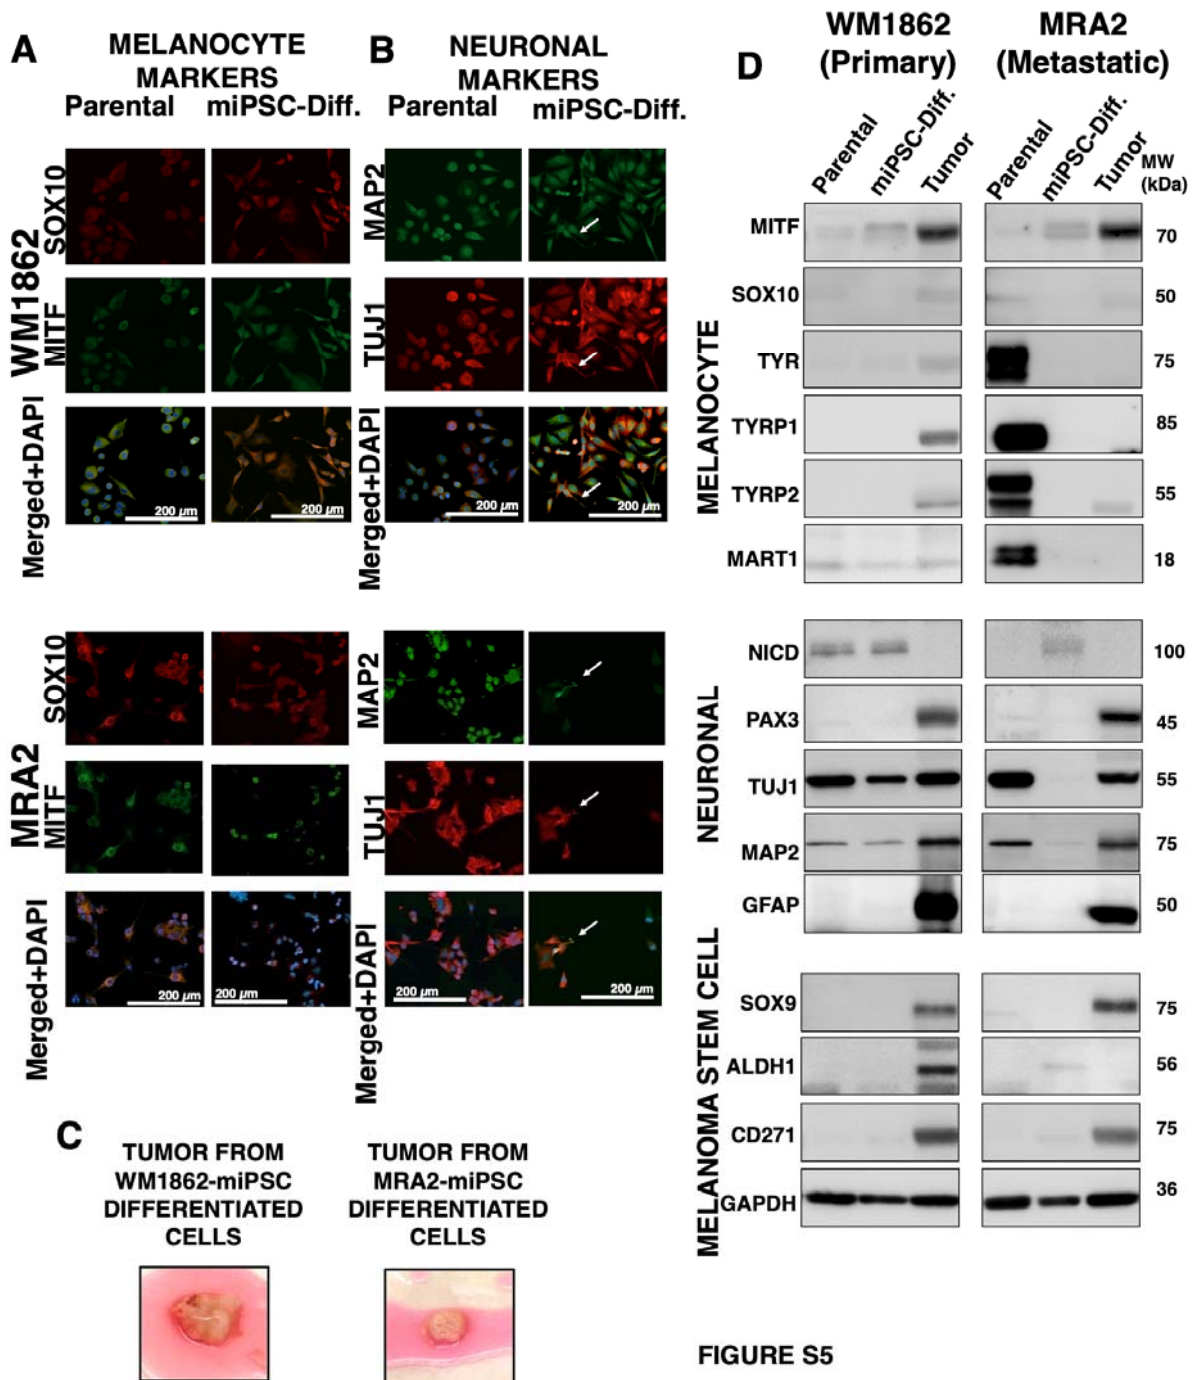

FIGURE S5

Figure S5 (Related to Figure 5)

Expression of Melanocyte and Neural Markers in miPSC-differentiated Cells and Tumors.

(A) Immunofluorescence staining of melanocyte markers in parental and miPSC-differentiated cells in melanocyte differentiation medium.



(B) Neuronal markers expression in parental and miPSC-differentiated cells in melanocyte differentiation medium.

(C) Tumors from miPSC-differentiated cells in melanocyte differentiation medium.

(D) Western blot analysis of melanocyte (*top panels*), neural (*middle panels*) and melanoma/stem cell markers (*bottom panels*) in parental melanoma and miPSC-differentiated cells in melanocyte medium and tumors from miPSC-differentiated cells. WM1862 (*left panels*) and metastatic MRA2 (*right panels*).

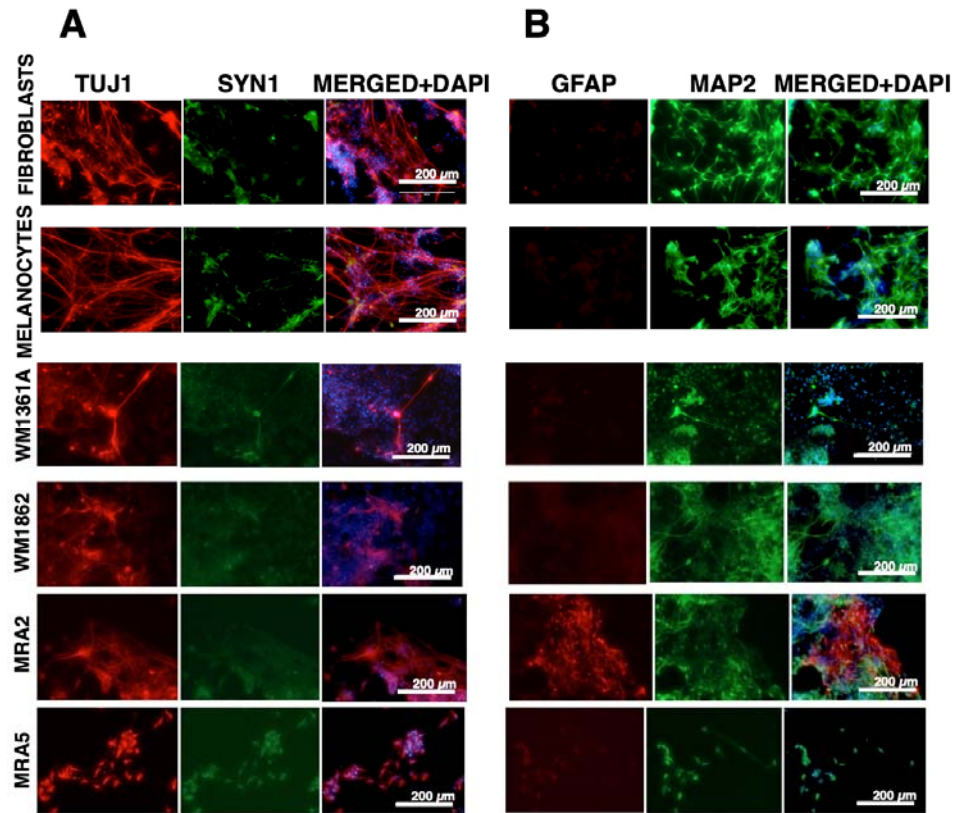

**FIGURE S6**

**Figure S6 (Related to Figure 5)**

**Neuronal Differentiation of Fibroblast-, Melanocyte- and miPSCs.**

(A) Immunofluorescence staining of neuronal markers neuronal tubulin (TUJ1) and SYNAPSIN1 (SYN1) from neuronal differentiation of fibroblast- and melanocyte-iPSCs and melanoma-miPSCs.

(B) Immunofluorescence staining of glial (GFAP) and neuronal (MAP2) markers from neuronal differentiation of fibroblast- and melanocyte-iPSCs and miPSCs.

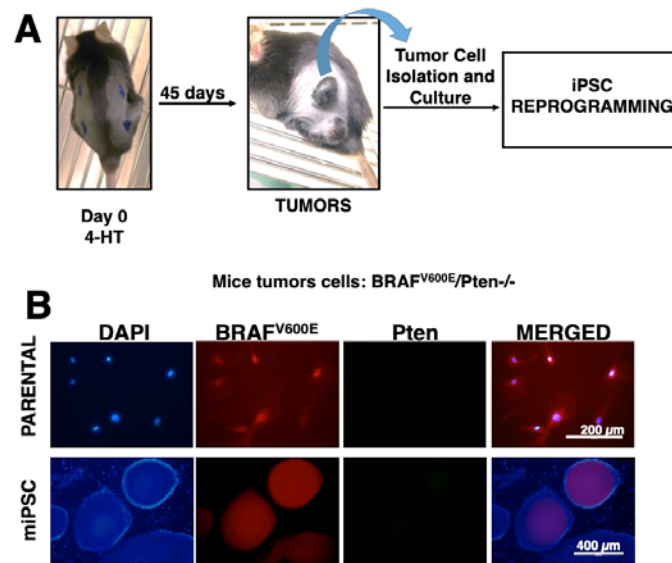

**FIGURE S7**

**Figure S7 (Related to Figure 5)**

**Isolation and Reprogramming of BRAF<sup>V600E</sup>/Pten<sup>-/-</sup> Mouse Tumor Cells.**

(A) BRAF<sup>V600E</sup>/Pten<sup>-/-</sup> mice tumors were induced by topical application of tamoxifen (4-HT) at day 0 and tumors were excised on day 45. Tumor cells were isolated and cultured for iPSC reprogramming.

(B) BRAF<sup>V600E</sup>/Pten<sup>-/-</sup> mouse tumor cells and miPSC derived colonies stained for BRAF<sup>V600E</sup> and Pten. iPSC colonies generated from BRAF<sup>V600E</sup>/Pten<sup>-/-</sup> tumor cells expressed BRAF<sup>V600E</sup> but not Pten similar to parental cells.

## SUPPLEMENTAL TABLES

**Table S1: Cell lines used in the study, tumor stage and mutations (Related to Figure 1 and Figure S1)**

| <b>Cell Line</b> | <b>Tumor Stage</b> | <b>Mutations</b>     | <b>WT</b>               |
|------------------|--------------------|----------------------|-------------------------|
| WM115            | Primary            | BRAFV600D, PTEN loss | NRAS, c-KIT, CDK4       |
| WM239A           | Metastatic         | BRAFV600D, PTEN loss | NRAS, c-KIT, CDK4       |
| WM165-1          | Metastatic         | BRAFV600D, PTEN loss | NRAS, c-KIT, CDK4       |
| WM266-4          | Metastatic         | BRAFV600D, PTEN loss | NRAS, c-KIT, CDK4       |
| WM1361A          | Primary            | NRASQ61R, PTEN loss  | NRAS, c-KIT, CDK4       |
| WM1552C          | Primary            | BRAFV600E, PTEN loss | NRAS, c-KIT, CDK4       |
| WM1862           | Primary            | BRAFV600E            | NRAS, c-KIT, CDK4       |
| WM75             | Primary            | BRAFV600E            | PTEN, NRAS, c-KIT, CDK4 |
| MRA2             | Metastatic         | PTEN loss            | BRAF                    |
| MRA4             | Metastatic         | PTEN loss            | BRAF                    |
| MRA5             | Metastatic         | BRAFV600E, PTEN loss | ND                      |
| MRA6             | Metastatic         | BRAFV600E, PTEN loss | ND                      |
| MRA9             | Metastatic         | PTEN loss            | BRAF                    |

**Table S2: List of antibodies**

| <b>Marker</b>         | <b>Company</b>     | <b>Cat. #</b>  | <b>Dilution</b> |           |
|-----------------------|--------------------|----------------|-----------------|-----------|
|                       |                    |                | <b>WB</b>       | <b>IF</b> |
| OCT4                  | Cell Signaling     | 2840           | 1:1000          | 1:50      |
| SOX2                  | R&D Systems        | MAB2018        | N.A.            | 1:50      |
| NANOG                 | Cell Signaling     | 4903           | 1:1000          | N.A.      |
| c-MYC                 | Cell Signaling     | 13987          | 1:1000          | N.A.      |
| p21                   | Cell Signaling     | 2946S          | 1:1000          | N.A.      |
| MITF                  | Thermo Fisher      | MA5-14146      | 1:500           | 1:50      |
| MITF                  | R&D Systems        | AF5769         | N.A.            | 1:50      |
| SOX10                 | R&D Systems        | AF2864         | 1:1000          | 1:50      |
| SYN1                  | Cell Signaling     | 5297           | N.A.            | 1:50      |
| TUJ1                  | R&D Systems        | MAB1195        | 1:1000          | 1:50      |
| MAP2                  | Cell Signaling     | 8707S          | 1:1000          | 1:50      |
| GFAP                  | Cell Signaling     | 3670S          | 1:1000          | 1:50      |
| ERK                   | Cell Signaling     | 9122S          | 1:1000          | N.A.      |
| pERK                  | Cell Signaling     | 4370S or 4696S | 1:1000          | N.A.      |
| BRAF <sup>V600E</sup> | Spring Biosciences | E19290         | N.A.            | 1:50      |
| PTEN                  | Cell Signaling     | 9559S          | N.A.            | 1:50      |
| TYR                   | Abcam              | ab170905       | 1:1000          | N.A.      |
| TYRP1                 | Santa Cruz         | sc-166857      | 1:1000          | N.A.      |
| TYRP2                 | Santa Cruz         | sc-74439       | 1:1000          | N.A.      |
| MART1                 | Bio Care Medical   | CM077A         | 1:1000          | N.A.      |
| NICD                  | Cell Signaling     | 4147S          | 1:1000          | N.A.      |
| PAX3                  | R&D Systems        | MAB2457        | 1:1000          | N.A.      |
| SOX9                  | R&D Systems        | AF3075         | 1:1000          | N.A.      |
| ALDH1                 | R&D Systems        | AF5869         | 1:1000          | N.A.      |
| CD271                 | R&D Systems        | MAB367         | 1:1000          | N.A.      |
| GAPDH                 | Proteintech        | 60004-1-Ig     | 1:3000          | N.A.      |

**Table S3: Media, supplements and recombinant proteins used**

| <b>Media/Supplement</b> | <b>Company</b> | <b>Cat. #</b> |
|-------------------------|----------------|---------------|
| Knockout(tm) Sr;        | Thermo Fisher  | 10828028      |
| DMEM                    | Thermo Fisher  | 11995065      |
| DMEM/F-12               | Thermo Fisher  | 11320033      |
| Medium 254              | Thermo Fisher  | M254500       |
| HMGS-2                  | Thermo Fisher  | S0165         |
| Neurobasal              | Thermo Fisher  | A1371201      |
| Glutamax                | Thermo Fisher  | 35050061      |
| Knockout(tm) D-mem;     | Thermo Fisher  | 10829018      |
| B-27                    | Thermo Fisher  | 17504044      |
| N-2                     | Thermo Fisher  | 17502048      |
| Ham's F-10              | Corning        | 10-070-CV     |
| Matrigel                | Corning        | 356231        |
| ITS                     | Sigma          | I3146         |
| Linoleic Acid           | Sigma          | L9530         |
| Endothelin 3            | Tocris         | 1162          |
| Fibronectin             | R&D Systems    | 1030-FN-01M   |
| SCF                     | R&D Systems    | 7466-SC-010   |
| Wnt-3a                  | R&D Systems    | 5036-WN-010   |
| bFGF                    | R&D Systems    | 233-FB-025    |
| Noggin                  | R&D Systems    | 6057-NG-025   |
| LIF                     | Thermo Fisher  | PHC9484       |
| NEAA                    | Thermo Fisher  | 11140050      |
| Antibiotics             | Thermo Fisher  | 15140122      |
| Versene                 | Thermo Fisher  | 15040066      |

**Table 4: List of Chemicals and reagents used**

| <b>Protein/Chemical</b> | <b>Company</b>    | <b>Cat. #</b> |
|-------------------------|-------------------|---------------|
| Y-27632                 | AdipoGen          | AG-CR1-3564   |
| Valproic Acid           | Selleckchem       | S1168         |
| CHIR99021               | Selleckchem       | S1263         |
| RepSox                  | Selleckchem       | S7223         |
| Tranylcypromine         | Selleckchem       | S4246         |
| Forskolin               | Selleckchem       | S2449         |
| PD0325901               | Selleckchem       | S1036         |
| Ascorbic acid           | Fisher Scientific | PHR1008-2G    |
| Dexamethasone           | Sigma             | D4902         |
| SB431542                | Fisher Scientific | NC1173633     |
| LDN-193189              | Fisher Scientific | NC1117386     |
| Choleratoxin            | Sigma             | C8052         |
| TPA                     | Sigma             | 736414        |
| G418 (Geneticin)        | Mirus             | MIR 5920      |
| IBMX                    | Sigma             | I5879         |
| 2-Mercaptoethanol       | Sigma             | M7522         |
| PLX4032                 | Selleckchem       | S1267         |
| AZD6244                 | Selleckchem       | S1008         |
| 4HT                     | Sigma             | 06734         |
| MTT dye solution        | Sigma             | M5655         |

## **SUPPLEMENTAL EXPERIMENTAL PROCEDURES**

### **Lentivirus Production and Cell Transduction**

HEK293 cells were plated on 10 cm plates in DMEM and 10% FBS without antibiotics and allowed to reach 70 – 90 % confluence within 24-48 hours. Following the Lipofectamine 2000 (Thermo Fisher, #11668019) protocol cells were then triple co-transfected with plasmids containing packaging (psPAX2, Addgene #12260) and VSV G envelope (pMD2.G, Addgene #12259) and target genes [(OCT4-SOX2, pSIN4-EF2-O2S, Addgene #21162) or KLF4-cMYC (pSIN4-CMV-K2M, Addgene #21164) or NANOG-LIN28 (pSIN4-EF2-N2L, Addgene #21163) or BRAF<sup>V600E</sup>-GFP [a gift from Dr. Raabe (Raabe et al., 2011)] or NICD-GFP or Empty vector-GFP [gifts from Dr. Herlyn (Zabierowski et al., 2011)].

For reprogramming, cells were plated in 6-well plates at a density of  $5 \times 10^4$  cells per well in 2mL of corresponding medium. The next day cells were transduced with three lentiviruses containing the reprogramming factors (200 $\mu$ L each) and polybrene (8  $\mu$ g/mL). Approximately 18 - 20 hours after transduction, the medium was removed and replaced with fresh medium. Cells were then allowed to grow for 5 days before reprogramming. For BRAF<sup>V600E</sup>, NICD and Empty vector lentiviruses we used a similar procedure for transduction.



### **Stem cell markers expression and pluripotency assays**

Expression of stem cell markers was performed using the Human Pluripotent Stem Cell Marker Antibody Panel Plus (R&D Systems #SC009). Differentiation of miPSCs into three germ layer was evaluated using the Human Pluripotent Stem Cell Functional Identification Kit (R&D Systems #SC027B). Images were taken using an EVOS™ FL Auto Imaging System (Thermo Fisher).

### **Embryoid Body Formation and Melanocyte Differentiation**

Embryoid bodies (EBs) and melanocyte differentiation were performed as reported by (Ohta et al., 2011; Yang et al., 2011) with some modifications. Briefly, EBs were formed from hanging drop culture in EB medium consisting of DMEM/F12 containing 20% KOSR, 1X glutamax, 1X nonessential amino acids (NEAA),  $2 \times 10^{-4}$  M 2-mercaptoethanol, and 1% antibiotics in a cell culture dish with sterile PBS in the bottom for 5 days. EBs were then plated on a fibronectin-coated (FN) dish in Melanocyte differentiation medium consisting of 1:1 DMEM/254 melanocyte medium +HMGS2, 10% FBS, and supplemented with 50 ng/ml WNT3a, 50 ng/ml stem cell factor (SCF), 100 mM endothelin-3 (ET-3), 20 pM cholera toxin (CT), 50 nM TPA, 4 ng/ml bFGF, 100 mM L-ascorbic acid, 0.05 mM dexamethasone, 1X linoleic acid and 1X insulin-transferrin-selenium (ITS). Medium was changed every 3-4 days until the appearance of pigmented cells (35 - 40 days). After differentiation, melanocyte differentiation medium was replaced with F-10 melanocyte medium [Ham's F10, 5% FBS, 1% antibiotics, cholera toxin (0.02 µg/mL), TPA (0.5 µg/mL), IBMX (0.1 mM)] containing geneticin (G418, 100 µg/ml) for 2 days and kept in F-10 melanocyte medium for expansion and long-term maintenance. G418 treatment was repeated as needed. For MTT assays, F-10 melanocyte medium was replaced by DMEM/10% FBS/1% antibiotic for two weeks and passed at least 5 times.

### **Neuronal Differentiation**

Neuronal differentiation was performed essentially as reported (Bernhardt et al., 2017). Briefly, cells were plated on 24 well plates coated with matrigel at  $2 \times 10^4$  cells per  $\text{cm}^2$  in DMEM/F12 with 20% KOSR, 2 mM glutamax, 1% NEAA, 1% antibiotic, 0.1 mM 2-mercaptoethanol, 10 ng/mL human LIF and 1 µM of ROCK inhibitor Y-27632. After 2 days, medium was changed to 1:1 DMEM/F12 and Neurobasal media with 1% B-27 and 0.5% N-2 supplements, 100 ng/mL Noggin, 0.5 µM LDN-193189, 10 µM SB-431542, 2 µM CHIR99021, 10 µM FSK, and 10 ng/mL bFGF for 1-2 weeks. Then, cells were cultured for an additional week without small chemical compounds with 10 ng/mL bFGF.

### **BRAF-Pten Mice Tumor Cells Induction and Isolation**

Transgenic *Tyr::CreER;Braf<sup>CA</sup>;Pten<sup>lox4-5/lox4-5</sup>* mice (Dankort et al. 2009) were obtained from The Jackson Laboratory, Bar Harbor, ME. Mice (females and males 4-weeks old). Tumor cell induction was performed as previously described (Rodríguez et al., 2017). Briefly, mice were hair trimmed and a single 2 µL topical dose of 5 mM 4-Hydroxytamoxifen (4-HT) was applied on the skin. Mice were monitored every 3 days and between days 40-45, mice were euthanized and each tumor excised. BRAF mutation status was confirmed by DNA sequencing and western blot. *Braf<sup>CA</sup>/Pten<sup>-/-</sup>* mouse melanoma cell lines were established and cultured as previously described (Jenkins et al., 2014; Rodríguez et al., 2017). Briefly, 4-HT-induced tumors were digested in 4 mg/mL collagenase type I (Thermo Fisher, #17018029) for 1 hr. Following digestion, the tumor pieces were manually dissociated with a serological pipette and filtered through a 70 µm cell strainer. Cells were cultured in DMEM/F-12 advanced (Thermo Fisher, #12634010) with 5% FBS and 1%

antibiotics for up to two weeks. Cells from tumors were plated in DMEM with 10% FBS, 1% antibiotics for expansion and maintenance. Animal experiments were approved by the institutional animal care and use committee.

### **Xenograft of miPSC-Differentiated Cells**

For tumorigenicity analysis,  $1 \times 10^6$  cells from miPSC-differentiated cells in melanocyte differentiation medium, were resuspended in 50% Matrigel and subcutaneously injected in NOD/SCID mice (4 weeks old male or female, ENVIGO). Mice were euthanized 6 weeks after cells were injected or when developing tumors reached ~1 cm size diameter.

### **Western Blotting**

Cells were harvested and lysed using RIPA buffer containing Halt protease inhibitor cocktail (Thermo Fisher, #78410) and phosphatase inhibitor cocktail (Bimake.com, #B15001). Samples were then sonicated, centrifuged for 30 min at 4°C and the supernatants were collected. Protein concentration was estimated using Pierce BCA Protein Assay Kit (Thermo Fisher, #23227). SDS-PAGE was performed using 20µg of protein and proteins were transferred to a PVDF membrane. The membrane was blocked with 5% nonfat dry milk prepared in TBST buffer. After incubation overnight with primary antibodies at optimized dilutions (Table S2, WB), membranes were washed and incubated with HRP conjugated secondary antibodies. Protein bands were detected using ECL Start Western Blotting Detection Reagent (Thermo Fisher, #32106), imaged on ImageQuant LAS 4000 (GE Healthcare Life Sciences, Marlborough, MA).

### **Immunofluorescence**

Cells were plated on 8-well slides (Ibidi, USA, #80826), fixed in 4% PFA/PBS for 20 min and then incubated in permeabilization/blocking buffer consisting of 0.3% Triton X-100, 1% BSA, and 10% normal donkey serum in PBS for 45 minutes (0.5 mL/well of a 24-well plate). Primary antibodies (Table S2, IF) were diluted in permeabilization/blocking buffer and incubated overnight at 4 degrees. Next day, cells were washed 3 times with 1% BSA in PBS for 5 minutes and incubated for 1h with secondary antibody (1:200) at RT. After three washes with 1% BSA/PBS, ProLong Gold Antifade with DAPI (Thermo Fisher, #P36935) was added to the cells and cells were visualized using the EVOS microscope (Thermo Fisher).

### **Senescence-Associated $\beta$ -Gal Staining and Cell Quantification**

Cellular senescence was determined using the Senescence  $\beta$ -Galactosidase Staining Kit (Cell Signaling #9860S) following the manufacturer's protocol. Briefly, five thousand cells were plated on 24-well plates and next day transduced with equivalent reprogramming factors. Senescence associated- $\beta$ -galactosidase staining was performed at days 1 and 5 after transduction. Wells were then scanned using the EVOS microscope and images were processed using Adobe PhotoShop and ImageJ for cell quantification.

### **RNA-Seq analysis**

Quality control was carried out using FastQC (Andrews 2010, <http://www.bioinformatics.babraham.ac.uk/projects/fastqc/>); no samples were omitted from the analysis. Sequence reads were mapped against the Human genome (Hg19 Refseq reference) using Bowtie 0.12.8 (Langmead et al., 2009) allowing up to two mismatches and up to 20 multiple hits. Transcripts per million (TPMs) expected were estimated via RSEM 1.2.3 (Li et al., 2010).

Differential gene expression analysis, clustering, and gene set analysis were performed in R (R-Development-Core-Team, 2007). Differentially expressed (DE) genes between MPKi-resistant (MRA5, MRA6BR, MRA6MR) and MAPKi-sensitive (MRA6) cell lines were identified using EBSeq (Leng et al., 2013) and fold-change cut off. We selected genes with differential expression probability at least 0.99 (i.e. 1% FDR) and at least a two-fold change. We retained only genes that also were annotated to several relevant Gene Ontology categories.

## REFERENCES:

- Bernhardt, M., Novak, D., Assenov, Y., Orouji, E., Knappe, N., Weina, K., Reith, M., Larribere, L., Gebhardt, C., Plass, C., *et al.* (2017). Melanoma-Derived iPCCs Show Differential Tumorigenicity and Therapy Response. *Stem Cell Reports* 8, 1379-1391.
- Jenkins, M.H., Steinberg, S.M., Alexander, M.P., Fisher, J.L., Ernstoff, M.S., Turk, M.J., Mullins, D.W., and Brinckerhoff, C.E. (2014). Multiple murine BRAf(V600E) melanoma cell lines with sensitivity to PLX4032. *Pigment Cell Melanoma Res* 27, 495-501.
- Langmead, B., Trapnell, C., Pop, M., and Salzberg, S.L. (2009). Ultrafast and memory-efficient alignment of short DNA sequences to the human genome. *Genome Biology* 10, R25.
- Leng, N., Dawson, J.A., Thomson, J.A., Ruotti, V., Rissman, A.I., Smits, B.M., Haag, J.D., Gould, M.N., Stewart, R.M., and Kendziorski, C. (2013). EBSeq: an empirical Bayes hierarchical model for inference in RNA-seq experiments. *Bioinformatics (Oxford, England)* 29, 1035-1043.
- Li, B., Ruotti, V., Stewart, R.M., Thomson, J.A., and Dewey, C.N. (2010). RNA-Seq gene expression estimation with read mapping uncertainty. *Bioinformatics (Oxford, England)* 26, 493-500.
- Ohta, S., Imaizumi, Y., Okada, Y., Akamatsu, W., Kuwahara, R., Ohyama, M., Amagai, M., Matsuzaki, Y., Yamanaka, S., Okano, H., *et al.* (2011). Generation of human melanocytes from induced pluripotent stem cells. *PLoS One* 6, e16182.
- R-Development-Core-Team (2007). R: A language and environment for statistical computing. R Foundation for Statistical Computing. (Vienna, Austria: R Foundation for Statistical Computing).
- Raabe, E.H., Lim, K.S., Kim, J.M., Meeker, A., Mao, X.G., Nikkhah, G., Maciaczyk, J., Kahlert, U., Jain, D., Bar, E., *et al.* (2011). BRAF activation induces transformation and then senescence in human neural stem cells: a pilocytic astrocytoma model. *Clin Cancer Res* 17, 3590-3599.

Rodríguez, C.I., Castro-Pérez, E., Prabhakar, K., Block, L., Longley, B.J., Wisinski, J.A., Kimple, M.E., and Setaluri, V. (2017). EPAC-RAP1 Axis-Mediated Switch in the Response of Primary and Metastatic Melanoma to Cyclic AMP. *Mol Cancer Res* 15, 1792-1802.

Yang, R., Jiang, M., Kumar, S.M., Xu, T., Wang, F., Xiang, L., and Xu, X. (2011). Generation of melanocytes from induced pluripotent stem cells. *J Invest Dermatol* 131, 2458-2466.

Zabierowski, S.E., Baubet, V., Himes, B., Li, L., Fukunaga-Kalabis, M., Patel, S., McDaid, R., Guerra, M., Gimotty, P., Dahmane, N., *et al.* (2011). Direct reprogramming of melanocytes to neural crest stem-like cells by one defined factor. *Stem Cells* 29, 1752-1762.
